# Supplementary material for: Oleanolic acid, a small-molecule natural product, inhibits ECM degeneration in osteoarthritis by regulating the Hippo/YAP and Wnt/β-catenin pathways
Source: Royal Society of Chemistry journal article supplement (doi:10.1039/d3fo01902k), 2023-01-01
Supplement: d3fo01902k1.pdf [file d3fo01902k1.pdf]

### Supplementary material

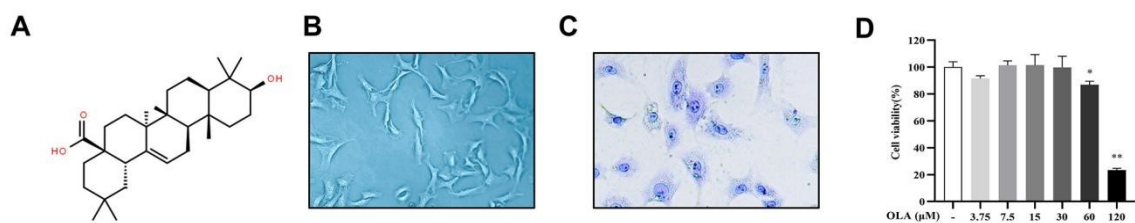

**Supplementary material 1.** Effect of OLA on chondrocyte viability. (A) Chemical structure of OLA. (B) Morphological observation of second-generation chondrocytes (100x). (C) Toluidine blue staining image (100x) of second-generation chondrocyte. (D) CCK-8 method to observe the activity of chondrocytes treated with different doses of OLA for 24 h. Data are presented as the means  $\pm$  SD (n = 3). \*P < 0.05 and \*\* P < 0.01 compared to the control group.
